# Supplementary material
Source: publisher figshare collection journal article supplement (https://aacr.figshare.com/ndownloader/files/39966955)
Supplement: Supplementary file 1 [file 39966955]

Supplemental Figure 2

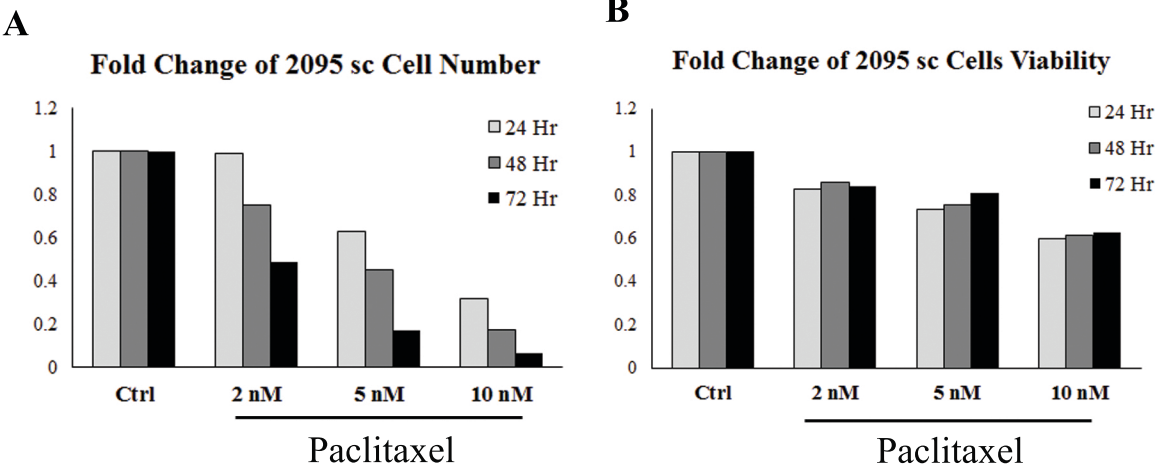

***Supplemental Figure 2.*** Dosing optimization studies, which used a hemocytometer and trypan blue exclusion to assess cell number and viability, respectively, demonstrated that paclitaxel treatment for 72 h (fresh drug and medium applied q.d.) decreased cell numbers in a dose and time dependent fashion (**A**). The paclitaxel tolerant cells after 5 nM treatment retained an approximate 80% viability (**B**). Retention of cell membrane integrity, as indicated by viability, was essential for the subsequent stem cell selection procedure that entailed three consecutive passages of the 72 h 5  $\mu$ M paxlitaxel treated cells as tumor sphere suspension cultures in low attachment flasks.
